# Supplementary material
Source: publisher site journal article supplement (https://www.spandidos-publications.com/2947/downloadSupplementary)
Supplement: Supplementary file 1 [file downloadSupplementary]

## Sheet: Table S2 KEGG
Table SIII. KEGG pathway
Term	database	Id	Sample number	Background number	P-Value	Corrected P-Value	GeneIDs	Genes
Systemic lupus erythematosus	KEGG PATHWAY	rno05322	44	126	1.74395e-15	4.2378e-13	684762;362634;680498;64647;680615;680322;309621;684841;24231;24232;688090;100912290;291157;306970;100910200;100912338;502125;499675;679994;100360754;24237;502129;361247;680097;58940;56822;500987;294269;310678;680312;312705;295279;100360950;117512;679983;680403;291159;298566;29687;306962;192262;691488;100365043;306969	LOC684762;C1qc;LOC680498;Hist1h2bl;Hist1h2ak;LOC680322;RT1-Ba;LOC684841;C2;C3;RT1-Bb;LOC100912290;Hist1h2bo;Hist1h2an;LOC100910200;LOC100912338;Hist1h2ah;Hist2h2ac;Hist1h3a;LOC100360754;C6;Hist1h2ai;Hist1h2bd;LOC680097;H2afz;Cd86;H2afx;RT1-Da;Hist2h3c2;Hist1h2bk;C1r;Fcgr1a;LOC100360950;C9;Hist1h4a;Hist1h2bcl1;Hist1h2ail;C1qa;C1qb;Hist1h2ac;C1s;Hist3h2bb;LOC100365043;Hist1h2bf
Staphylococcus aureus infection	KEGG PATHWAY	rno05150	21	54	8.57133e-09	1.04142e-06	362634;84007;289211;298566;29687;113959;294257;25651;58949;309621;312705;79126;295279;365183;24367;192262;24231;24232;688090;294269;25021	C1qc;C3ar1;Fcgr2b;C1qa;C1qb;C5ar1;Cfb;Selp;Ptafr;RT1-Ba;C1r;Cfi;Fcgr1a;Fcar;Fgg;C1s;C2;C3;RT1-Bb;RT1-Da;Itgam
Complement and coagulation cascades	KEGG PATHWAY	rno04610	23	72	3.50795e-08	2.84144e-06	362634;294257;24366;192262;24231;24232;24235;24237;100911545;79126;295703;113959;312705;113936;117512;84007;298566;29687;25087;290757;50692;24648;24367	C1qc;Cfb;Fgb;C1s;C2;C3;C4bpa;C6;LOC100911545;Cfi;Serping1;C5ar1;C1r;Cpb2;C9;C3ar1;C1qa;C1qb;Kng1;F11;Plaur;Serpina1;Fgg
Alcoholism	KEGG PATHWAY	rno05034	34	175	8.45064e-07	5.13376e-05	684762;680498;64647;25054;680615;680322;291159;684841;679994;25686;100912290;291157;306970;63997;100910200;100912338;502125;499675;100360754;680403;502129;361247;680097;58940;500987;191573;310678;680312;100360950;679983;306962;691488;100365043;306969	LOC684762;LOC680498;Hist1h2bl;Ntrk2;Hist1h2ak;LOC680322;Hist1h2ail;LOC684841;Hist1h3a;Gnai1;LOC100912290;Hist1h2bo;Hist1h2an;Slc29a1;LOC100910200;LOC100912338;Hist1h2ah;Hist2h2ac;LOC100360754;Hist1h2bcl1;Hist1h2ai;Hist1h2bd;LOC680097;H2afz;H2afx;Grin3a;Hist2h3c2;Hist1h2bk;LOC100360950;Hist1h4a;Hist1h2ac;Hist3h2bb;LOC100365043;Hist1h2bf
Pertussis	KEGG PATHWAY	rno05133	20	72	1.69382e-06	8.23194e-05	64546;25686;60350;362634;292060;448830;298566;29687;312705;60665;24235;24498;192262;295703;24231;24232;24493;24599;24773;25021	Il12b;Gnai1;Cd14;C1qc;Irf8;Ly96;C1qa;C1qb;C1r;Cxcl6;C4bpa;Il6;C1s;Serping1;C2;C3;Il1a;Nos2;Sftpa1;Itgam
Phagosome	KEGG PATHWAY	rno04145	35	195	2.85832e-06	0.000115762	498638;500377;291081;25350;293650;114553;298068;309621;29213;24232;688090;364018;292406;246118;79129;117596;24773;367391;501854;294269;312705;295279;297932;100909441;685232;60350;25021;310553;300218;307351;289211;365183;24988;66021;50654	Msr1;Tuba8;Tubb2b;Sftpd;Tcirg1;Ncf1;Sec61b;RT1-Ba;Tubb4a;C3;RT1-Bb;Ncf2;Thbs2;Tubb3;Cyba;Atp6v1b2;Sftpa1;Marco;Rab7b;RT1-Da;C1r;Fcgr1a;Atp6v0d2;LOC100909441;Atp6v1a;Cd14;Itgam;Tlr2;Tuba1c;Tubb6;Fcgr2b;Fcar;RT1-M2;Cybb;Ctss
Rheumatoid arthritis	KEGG PATHWAY	rno05323	20	87	1.88643e-05	0.000654861	89804;688090;287562;293650;56822;117596;294269;63835;25732;24770;24498;309621;60665;310553;78965;297932;25542;29175;685232;24493	Tek;RT1-Bb;Ccl12;Tcirg1;Cd86;Atp6v1b2;RT1-Da;Ctla4;Acp5;Ccl2;Il6;RT1-Ba;Cxcl6;Tlr2;Csf1;Atp6v0d2;Ccl3;Ctsk;Atp6v1a;Il1a
Cytokine-cytokine receptor interaction	KEGG PATHWAY	rno04060	34	215	4.06421e-05	0.0012345	498335;500598;29591;25647;500590;25704;24498;652957;25542;81680;78965;24493;245920;353218;100124593;306748;24770;64546;305236;117551;301066;117022;289747;117029;171081;114105;25572;287562;301086;287561;116637;24500;360918;25589	Cxcl13;Tnfrsf18;Tgfbr1;Il7;Tnfrsf9;Il2ra;Il6;Csf2ra;Ccl3;Lifr;Csf1;Il1a;Cxcl10;Tnfsf9;Cxcr6;Cxcl14;Ccl2;Il12b;Cxcl11;Ccl22;Ccr8;Il1r2;Osm;Ccr5;Csf2rb;Cxcl2;Tnfrsf4;Ccl12;Xcr1;Ccl7;Ccl4;Il9r;Pf4;Kdr
Amoebiasis	KEGG PATHWAY	rno05146	21	108	9.88698e-05	0.00266948	64546;501854;25021;310553;117022;89788;291091;311862;84032;266775;24498;60379;25661;363265;305509;29221;60350;24599;117512;25654;29393	Il12b;Rab7b;Itgam;Tlr2;Il1r2;Gna15;Serpinb1a;Lamc3;Col3a1;Serpinb10;Il6;Col5a3;Fn1;Col4a3;Adcy1;Arg1;Cd14;Nos2;C9;Col11a1;Col1a1
Lysosome	KEGG PATHWAY	rno04142	22	127	0.000291978	0.00709507	25524;293650;303801;293676;287435;25425;24375;286898;367304;29175;63865;64529;24434;282838;25732;297932;29186;252929;314360;367166;171293;50654	Psap;Tcirg1;Lamp3;Ctsw;Cd68;Ctsh;Fuca1;Npc2;Ap1s3;Ctsk;Lgmn;Ctsb;Gusb;Gm2a;Acp5;Atp6v0d2;Cd63;Ctsz;Galc;Hyal1;Ctsd;Ctss
Chemokine signaling pathway	KEGG PATHWAY	rno04062	27	178	0.000431515	0.00953257	25156;114553;117518;116637;304109;25542;25686;245920;100124593;360579;306748;305509;24770;498335;305236;117551;301066;25326;117029;688605;114105;287562;301086;287561;60665;360918;81503	Vav1;Ncf1;Ccl17;Ccl4;Tiam1;Ccl3;Gnai1;Cxcl10;Cxcr6;Ccl9;Cxcl14;Adcy1;Ccl2;Cxcl13;Cxcl11;Ccl22;Ccr8;Jak3;Ccr5;Ccl1;Cxcl2;Ccl12;Xcr1;Ccl7;Cxcl6;Pf4;Cxcl1
Protein digestion and absorption	KEGG PATHWAY	rno04974	17	90	0.000585999	0.0118665	54242;315981;83509;25654;84032;65206;292657;293118;24212;24213;362584;113936;60379;84396;363265;29639;29393	Cpa3;Col6a4;Slc7a7;Col11a1;Col3a1;Kcnn4;Slc1a5;Prcp;Atp1a2;Atp1a3;Col9a2;Cpb2;Col5a3;Atp1b4;Col4a3;Fxyd2;Col1a1
Bile secretion	KEGG PATHWAY	rno04976	14	72	0.00135929	0.0254083	84396;24778;24255;24212;24213;81779;24904;170913;305509;29639;80900;24891;24777;24646	Atp1b4;Slc2a1;Cftr;Atp1a2;Atp1a3;Sctr;Slc22a1;Abcb1a;Adcy1;Fxyd2;Slco1a5;Abcb4;Slc10a1;Abcb1b
Chagas disease (American trypanosomiasis)	KEGG PATHWAY	rno05142	17	104	0.00234924	0.0407761	64546;89788;25686;310553;362634;29591;298566;29687;24770;24498;25542;305509;287562;24232;24599;498012;24310	Il12b;Gna15;Gnai1;Tlr2;C1qc;Tgfbr1;C1qa;C1qb;Ccl2;Il6;Ccl3;Adcy1;Ccl12;C3;Nos2;Ace3;Ace
Leishmaniasis	KEGG PATHWAY	rno05140	13	73	0.00388151	0.0628805	64546;114553;688090;294269;79129;309621;310553;295279;24232;24493;24599;364018;25021	Il12b;Ncf1;RT1-Bb;RT1-Da;Cyba;RT1-Ba;Tlr2;Fcgr1a;C3;Il1a;Nos2;Ncf2;Itgam
Hematopoietic cell lineage	KEGG PATHWAY	rno04640	14	83	0.00428605	0.0650944	691992;60350;78965;117022;294269;25647;24500;25704;24498;652957;295279;24493;24931;25021	Gp1ba;Cd14;Csf1;Il1r2;RT1-Da;Il7;Il9r;Il2ra;Il6;Csf2ra;Fcgr1a;Il1a;Cd8b;Itgam
ECM-receptor interaction	KEGG PATHWAY	rno04512	14	86	0.00564488	0.0806886	691992;116640;315981;311862;84032;362800;292406;304913;60379;25661;25460;25654;363265;29393	Gp1ba;Tnc;Col6a4;Lamc3;Col3a1;Itgb8;Thbs2;Tnn;Col5a3;Fn1;Hmmr;Col11a1;Col4a3;Col1a1
Terpenoid backbone biosynthesis	KEGG PATHWAY	rno00900	6	22	0.00851259	0.109833	81726;89784;29637;83791;24450;308100	Mvd;Idi1;Hmgcs1;Fdps;Hmgcs2;Acat2
Cell adhesion molecules (CAMs)	KEGG PATHWAY	rno04514	22	172	0.00867251	0.109833	499342;63835;309621;688090;117258;290485;307618;114122;64545;56822;294269;362800;25651;311426;497815;24988;25021;25544;84588;363784;24931;309304	Cd274;Ctla4;RT1-Ba;RT1-Bb;Cntn1;Cldn10;Cdh5;Vcan;Icos;Cd86;RT1-Da;Itgb8;Selp;Siglec1;Nrcam;RT1-M2;Itgam;Sele;Cldn11;Tigit;Cd8b;Pdcd1lg2
Mineral absorption	KEGG PATHWAY	rno04978	9	46	0.00903978	0.109833	100360087;24212;24213;689415;297738;84396;29639;29292;24451	LOC100360087;Atp1a2;Atp1a3;Mt2A;Steap1;Atp1b4;Fxyd2;Ftl1;Hmox1
Synthesis and degradation of ketone bodies	KEGG PATHWAY	rno00072	4	10	0.0108437	0.125477	24450;29637;308100;117099	Hmgcs2;Hmgcs1;Acat2;Bdh1
Viral carcinogenesis	KEGG PATHWAY	rno05203	27	234	0.0129462	0.141112	25729;680111;64647;64515;296654;680097;24232;100912290;291157;100910200;100912338;680403;361247;301066;25326;54237;680312;117029;114494;24988;297932;100360950;679983;691488;100365043;114090;306969	Ccne1;Rbl1;Hist1h2bl;Cdc20;Gsn;LOC680097;C3;LOC100912290;Hist1h2bo;LOC100910200;LOC100912338;Hist1h2bcl1;Hist1h2bd;Ccr8;Jak3;Cdk1;Hist1h2bk;Ccr5;Ccna2;RT1-M2;Atp6v0d2;LOC100360950;Hist1h4a;Hist3h2bb;LOC100365043;Egr2;Hist1h2bf
Transcriptional misregulation in cancer	KEGG PATHWAY	rno05202	21	169	0.0133563	0.141112	170929;24883;25021;684762;81819;117022;56822;79242;366126;680498;24498;291159;78971;295279;684841;679994;310678;170909;60350;24482;81687	Bcl2a1;Wt1;Itgam;LOC684762;Pax8;Il1r2;Cd86;Hpgd;Spi1;LOC680498;Il6;Hist1h2ail;Birc3;Fcgr1a;LOC684841;Hist1h3a;Hist2h3c2;Erg;Cd14;Igf1;Mmp9
Tuberculosis	KEGG PATHWAY	rno05152	22	181	0.0142638	0.144421	293650;170897;24498;309621;24232;688090;24493;289211;294269;24599;64546;499271;305354;295279;297932;60350;25021;310553;100363502;171293;64625;50654	Tcirg1;Sphk1;Il6;RT1-Ba;C3;RT1-Bb;Il1a;Fcgr2b;RT1-Da;Nos2;Il12b;Itgax;Tlr1;Fcgr1a;Atp6v0d2;Cd14;Itgam;Tlr2;LOC100363502;Ctsd;Bid;Ctss
Prion diseases	KEGG PATHWAY	rno05020	7	36	0.0207916	0.199066	362634;298566;29687;24498;24493;117512;24237	C1qc;C1qa;C1qb;Il6;Il1a;C9;C6
Steroid biosynthesis	KEGG PATHWAY	rno00100	5	20	0.0212993	0.199066	298298;29230;64191;25427;140910	Dhcr24;Sqle;Dhcr7;Cyp51;Msmo1
Osteoclast differentiation	KEGG PATHWAY	rno04380	16	126	0.0240369	0.216332	361537;114553;78965;366126;308350;79129;25732;301227;295279;289211;66021;29591;29175;24493;84492;364018	Tyrobp;Ncf1;Csf1;Spi1;RGD1566307;Cyba;Acp5;Trem2;Fcgr1a;Fcgr2b;Cybb;Tgfbr1;Ctsk;Il1a;Tec;Ncf2
Salivary secretion	KEGG PATHWAY	rno04970	11	76	0.0266769	0.231517	287610;170568;84396;65206;309114;29599;24212;24213;83731;305509;29639	Lpo;Dmbt1;Atp1b4;Kcnn4;Muc5b;Atp2b3;Atp1a2;Atp1a3;Kcnma1;Adcy1;Fxyd2
Proximal tubule bicarbonate reclamation	KEGG PATHWAY	rno04964	5	22	0.0290558	0.243468	24212;24213;29639;29242;84396	Atp1a2;Atp1a3;Fxyd2;Car4;Atp1b4
Legionellosis	KEGG PATHWAY	rno05134	9	61	0.0387631	0.313981	64546;310553;81503;24498;100363502;24232;60350;114105;25021	Il12b;Tlr2;Cxcl1;Il6;LOC100363502;C3;Cd14;Cxcl2;Itgam
@@DNA replication	KEGG PATHWAY	rno03030	3	38	0.509503	0.999932	29728;29685;291885	Mcm4;Mcm6;Mcm5
Cell cycle	KEGG PATHWAY	rno04110	15	127	0.0460753	0.361171	171576;25729;680111;296137;64515;29685;315852;291885;114494;54237;25203;29728;360621;315330;25515	Bub1b;Ccne1;Rbl1;Bub1;Cdc20;Mcm6;Ttk;Mcm5;Ccna2;Cdk1;Ccnb1;Mcm4;Cdc6;Espl1;Plk1
Toll-like receptor signaling pathway	KEGG PATHWAY	rno04620	12	96	0.0506208	0.372421	64546;305236;310553;56822;448830;305354;24498;116637;25542;29175;60350;245920	Il12b;Cxcl11;Tlr2;Cd86;Ly96;Tlr1;Il6;Ccl4;Ccl3;Ctsk;Cd14;Cxcl10
p53 signaling pathway	KEGG PATHWAY	rno04115	10	75	0.0512059	0.372421	25729;362931;54237;64625;170824;362720;100363502;100359539;24482;25203	Ccne1;Bai1;Cdk1;Bid;Steap3;Rrm2;LOC100363502;LOC100359539;Igf1;Ccnb1
Intestinal immune network for IgA production	KEGG PATHWAY	rno04672	7	45	0.0521128	0.372421	64545;56822;294269;25046;24498;309621;688090	Icos;Cd86;RT1-Da;Pigr;Il6;RT1-Ba;RT1-Bb
Pancreatic secretion	KEGG PATHWAY	rno04972	12	97	0.0536409	0.372421	54242;24255;29692;24212;24213;113936;81779;84396;83731;305509;29639;29599	Cpa3;Cftr;Pla2g2a;Atp1a2;Atp1a3;Cpb2;Sctr;Atp1b4;Kcnma1;Adcy1;Fxyd2;Atp2b3
Butanoate metabolism	KEGG PATHWAY	rno00650	5	27	0.0554683	0.374411	24450;29637;308100;171142;117099	Hmgcs2;Hmgcs1;Acat2;Lbp;Bdh1
Gap junction	KEGG PATHWAY	rno04540	11	88	0.0595251	0.390935	500377;24392;300218;307351;246118;291081;54237;29213;305509;100909441;25686	Tuba8;Gja1;Tuba1c;Tubb6;Tubb3;Tubb2b;Cdk1;Tubb4a;Adcy1;LOC100909441;Gnai1
Amino sugar and nucleotide sugar metabolism	KEGG PATHWAY	rno00520	7	47	0.0617265	0.394725	25060;683570;25059;302972;304860;113901;365345	Hk3;Gnpda1;Hk2;Amdhd2;Npl;Chia;Cyb5r2
PPAR signaling pathway	KEGG PATHWAY	rno03320	10	79	0.0660704	0.41167	83792;171142;140868;50549;79451;25629;79223;246074;24450;113976	Scd;Lbp;Fabp5;Cyp4a1;Fabp4;Plin1;Gk;Scd1;Hmgcs2;Acsl4
Butirosin and neomycin biosynthesis	KEGG PATHWAY	rno00524	2	5	0.0723967	0.43981	25060;25059	Hk3;Hk2
Salmonella infection	KEGG PATHWAY	rno05132	10	81	0.0744382	0.441182	501854;60350;81503;24599;24498;116637;54227;25542;24493;114105	Rab7b;Cd14;Cxcl1;Nos2;Il6;Ccl4;Arpc1b;Ccl3;Il1a;Cxcl2
Endocrine and other factor-regulated calcium reabsorption	KEGG PATHWAY	rno04961	7	50	0.0780473	0.451559	83504;24212;24213;65046;84396;29639;24890	Kl;Atp1a2;Atp1a3;Ap2s1;Atp1b4;Fxyd2;Esr1
HIF-1 signaling pathway	KEGG PATHWAY	rno04066	13	116	0.0809054	0.457209	25060;24383;25059;24533;116510;89804;24482;24498;24778;24333;66021;24599;24451	Hk3;Gapdh;Hk2;Ldha;Timp1;Tek;Igf1;Il6;Slc2a1;Eno1;Cybb;Nos2;Hmox1
Renin-angiotensin system	KEGG PATHWAY	rno04614	4	22	0.0871377	0.481238	54242;25627;498012;24310	Cpa3;Cma1;Ace3;Ace
Leukocyte transendothelial migration	KEGG PATHWAY	rno04670	13	120	0.0970869	0.51556	290485;114553;25021;307618;25156;24832;79129;84588;66021;252857;25686;364018;81687	Cldn10;Ncf1;Itgam;Cdh5;Vav1;Thy1;Cyba;Cldn11;Cybb;Rapgef4;Gnai1;Ncf2;Mmp9
TNF signaling pathway	KEGG PATHWAY	rno04668	12	109	0.0994836	0.51556	245920;78971;287562;81503;114105;24498;25544;24770;78965;246208;81707;81687	Cxcl10;Birc3;Ccl12;Cxcl1;Cxcl2;Il6;Sele;Ccl2;Csf1;Ifi47;Mmp14;Mmp9
Carbohydrate digestion and absorption	KEGG PATHWAY	rno04973	6	43	0.0997174	0.51556	25060;25059;24212;24213;84396;29639	Hk3;Hk2;Atp1a2;Atp1a3;Atp1b4;Fxyd2
Biosynthesis of amino acids	KEGG PATHWAY	rno01230	10	88	0.108716	0.550375	24191;24383;360816;58835;24333;24962;29221;287877;29592;24479	Aldoc;Gapdh;Sdsl;Phgdh;Eno1;Cth;Arg1;Pycr1;Bcat1;Idh1
Focal adhesion	KEGG PATHWAY	rno04510	20	208	0.113632	0.563521	117558;25404;315981;311862;84032;362800;192213;24482;292406;304913;78971;60379;25661;363265;25589;116640;689069;25156;25654;29393	Mylk2;Cav1;Col6a4;Lamc3;Col3a1;Itgb8;Rasgrf1;Igf1;Thbs2;Tnn;Birc3;Col5a3;Fn1;Col4a3;Kdr;Tnc;Parvg;Vav1;Col11a1;Col1a1
Malaria	KEGG PATHWAY	rno05144	7	56	0.117464	0.570877	310553;287562;25544;25651;24498;292406;24770	Tlr2;Ccl12;Sele;Selp;Il6;Thbs2;Ccl2
Tryptophan metabolism	KEGG PATHWAY	rno00380	6	46	0.123591	0.572574	368066;171142;24848;54349;65029;308100	Inmt;Lbp;Tph1;Aox1;Aoc1;Acat2
Glycosaminoglycan biosynthesis - keratan sulfate	KEGG PATHWAY	rno00533	3	16	0.124665	0.572574	295934;307859;316583	Chst1;Chst5;B3gnt7
NOD-like receptor signaling pathway	KEGG PATHWAY	rno04621	7	57	0.124882	0.572574	78971;287562;691998;24498;81503;24770;114105	Birc3;Ccl12;Nlrp1b;Il6;Cxcl1;Ccl2;Cxcl2
Thyroid hormone synthesis	KEGG PATHWAY	rno04918	8	69	0.131174	0.590285	81819;29440;25653;24212;24213;84396;305509;29639	Pax8;Slc26a4;Tshb;Atp1a2;Atp1a3;Atp1b4;Adcy1;Fxyd2
Pantothenate and CoA biosynthesis	KEGG PATHWAY	rno00770	3	17	0.139889	0.607874	498992;29592;54410	Vnn3;Bcat1;Enpp3
Sphingolipid metabolism	KEGG PATHWAY	rno00600	6	48	0.140918	0.607874	170897;286896;81536;314360;313339;314438	Sphk1;Sgpl1;Spp1;Galc;Acer2;Degs2
Collecting duct acid secretion	KEGG PATHWAY	rno04966	4	27	0.142588	0.607874	117596;685232;293650;297932	Atp6v1b2;Atp6v1a;Tcirg1;Atp6v0d2
Gastric acid secretion	KEGG PATHWAY	rno04971	8	72	0.153131	0.626979	117558;170899;24255;24212;24213;84396;305509;25686	Mylk2;Kcnk2;Cftr;Atp1a2;Atp1a3;Atp1b4;Adcy1;Gnai1
Circadian rhythm	KEGG PATHWAY	rno04710	4	28	0.155033	0.626979	309288;117095;79431;301518	Rorb;Bhlhe41;Bhlhe40;Prkag3
Inflammatory bowel disease (IBD)	KEGG PATHWAY	rno05321	7	61	0.156814	0.626979	64546;688090;294269;24498;309621;310553;24493	Il12b;RT1-Bb;RT1-Da;Il6;RT1-Ba;Tlr2;Il1a
cAMP signaling pathway	KEGG PATHWAY	rno04024	18	195	0.162356	0.626979	25330;50592;353250;191573;25156;24255;29599;24212;24213;140586;304109;84396;305509;29290;29639;252857;25686;25033	Lipe;Gria1;Niacr1;Grin3a;Vav1;Cftr;Atp2b3;Atp1a2;Atp1a3;Sox9;Tiam1;Atp1b4;Adcy1;Adora1;Fxyd2;Rapgef4;Gnai1;Sstr1
Propanoate metabolism	KEGG PATHWAY	rno00640	4	29	0.167867	0.626979	24533;311569;308100;171142	Ldha;Acss2;Acat2;Lbp
Nicotinate and nicotinamide metabolism	KEGG PATHWAY	rno00760	4	29	0.167867	0.626979	54349;300691;293504;54410	Aox1;Nnmt;Qprt;Enpp3
Asthma	KEGG PATHWAY	rno05310	4	29	0.167867	0.626979	294269;309621;688090;25316	RT1-Da;RT1-Ba;RT1-Bb;Ms4a2
Insulin secretion	KEGG PATHWAY	rno04911	9	86	0.170291	0.626979	24778;84396;65206;24212;24213;83731;305509;29639;252857	Slc2a1;Atp1b4;Kcnn4;Atp1a2;Atp1a3;Kcnma1;Adcy1;Fxyd2;Rapgef4
Progesterone-mediated oocyte maturation	KEGG PATHWAY	rno04914	9	86	0.170291	0.626979	25154;296137;54237;114494;25203;305509;25686;24482;25515	Pgr;Bub1;Cdk1;Ccna2;Ccnb1;Adcy1;Gnai1;Igf1;Plk1
Glycolysis / Gluconeogenesis	KEGG PATHWAY	rno00010	8	75	0.176715	0.631311	24191;25060;24383;25059;24533;311569;24333;25375	Aldoc;Hk3;Gapdh;Hk2;Ldha;Acss2;Eno1;Aldh3a1
Valine, leucine and isoleucine degradation	KEGG PATHWAY	rno00280	6	52	0.178645	0.631311	29592;171142;29637;54349;24450;308100	Bcat1;Lbp;Hmgcs1;Aox1;Hmgcs2;Acat2
Aldosterone-regulated sodium reabsorption	KEGG PATHWAY	rno04960	5	41	0.181611	0.631311	24212;24213;29639;24482;84396	Atp1a2;Atp1a3;Fxyd2;Igf1;Atp1b4
Toxoplasmosis	KEGG PATHWAY	rno05145	12	124	0.181859	0.631311	64546;25686;310553;448830;294269;311862;117029;309621;78971;100363502;688090;24599	Il12b;Gnai1;Tlr2;Ly96;RT1-Da;Lamc3;Ccr5;RT1-Ba;Birc3;LOC100363502;RT1-Bb;Nos2
Fatty acid metabolism	KEGG PATHWAY	rno01212	6	53	0.188658	0.645688	171142;50671;83792;246074;308100;113976	Lbp;Fasn;Scd;Scd1;Acat2;Acsl4
Graft-versus-host disease	KEGG PATHWAY	rno05332	7	66	0.201327	0.671703	688090;56822;294269;24498;309621;24988;24493	RT1-Bb;Cd86;RT1-Da;Il6;RT1-Ba;RT1-M2;Il1a
Arachidonic acid metabolism	KEGG PATHWAY	rno00590	8	78	0.201787	0.671703	58962;50549;25086;114097;29692;81639;24886;59103	Hpgds;Cyp4a1;Cyp2e1;Ltc4s;Pla2g2a;Alox15;Tbxas1;Ptges
Glycosaminoglycan degradation	KEGG PATHWAY	rno00531	3	21	0.20598	0.676395	64468;24434;367166	Hyal2;Gusb;Hyal1
Drug metabolism - cytochrome P450	KEGG PATHWAY	rno00982	7	69	0.230121	0.745593	246245;25086;81869;54349;25375;84493;25256	Fmo2;Cyp2e1;Gstm7;Aox1;Aldh3a1;Fmo3;Fmo1
Peroxisome	KEGG PATHWAY	rno04146	8	82	0.237247	0.753528	500368;171142;117254;24787;113898;24479;24599;113976	Far2;Lbp;Prdx1;Sod2;Prdx5;Idh1;Nos2;Acsl4
ABC transporters	KEGG PATHWAY	rno02010	5	46	0.241221	0.753528	24255;303639;24891;24646;170913	Cftr;Abca6;Abcb4;Abcb1b;Abcb1a
Neuroactive ligand-receptor interaction	KEGG PATHWAY	rno04080	24	289	0.241873	0.753528	29597;24807;24953;246075;29235;25033;29695;29290;25753;83567;367315;50592;191573;63843;113959;58949;25653;50672;84007;117264;25083;81779;24875;81658	P2ry2;Tacr1;Gcgr;Prlhr;Galr3;Sstr1;Gabrr2;Adora1;Chrng;Mchr1;Gpr35;Gria1;Grin3a;P2ry4;C5ar1;Ptafr;Tshb;Ednrb;C3ar1;P2ry6;Adra2a;Sctr;Vipr1;Gabrp
Carbon metabolism	KEGG PATHWAY	rno01200	11	121	0.24849	0.762098	24191;25060;24383;360816;25059;171142;311569;58835;24333;308100;24479	Aldoc;Hk3;Gapdh;Sdsl;Hk2;Lbp;Acss2;Phgdh;Eno1;Acat2;Idh1
Antigen processing and presentation	KEGG PATHWAY	rno04612	9	96	0.250909	0.762098	294269;309621;24988;63865;290644;64529;688090;50654;24931	RT1-Da;RT1-Ba;RT1-M2;Lgmn;Ifi30;Ctsb;RT1-Bb;Ctss;Cd8b
Oocyte meiosis	KEGG PATHWAY	rno04114	10	109	0.254033	0.762098	25729;25154;296137;54237;64515;25203;305509;315330;24482;25515	Ccne1;Pgr;Bub1;Cdk1;Cdc20;Ccnb1;Adcy1;Espl1;Igf1;Plk1
Folate biosynthesis	KEGG PATHWAY	rno00790	2	13	0.257896	0.764252	29244;687266	Gch1;Fpgs
Fatty acid biosynthesis	KEGG PATHWAY	rno00061	2	14	0.282862	0.817055	50671;113976	Fasn;Acsl4
Riboflavin metabolism	KEGG PATHWAY	rno00740	2	14	0.282862	0.817055	25732;54410	Acp5;Enpp3
Type I diabetes mellitus	KEGG PATHWAY	rno04940	7	75	0.291302	0.817055	64546;688090;56822;294269;309621;24988;24493	Il12b;RT1-Bb;Cd86;RT1-Da;RT1-Ba;RT1-M2;Il1a
Maturity onset diabetes of the young	KEGG PATHWAY	rno04950	3	26	0.295736	0.817055	24476;366949;25334	Iapp;Mafa;Bhlha15
Autoimmune thyroid disease	KEGG PATHWAY	rno05320	7	76	0.301856	0.817055	56822;63835;294269;25653;309621;24988;688090	Cd86;Ctla4;RT1-Da;Tshb;RT1-Ba;RT1-M2;RT1-Bb
Small cell lung cancer	KEGG PATHWAY	rno05222	8	89	0.303666	0.817055	78971;25729;311862;498709;100363502;363265;24599;25661	Birc3;Ccne1;Lamc3;Cks2;LOC100363502;Col4a3;Nos2;Fn1
Jak-STAT signaling pathway	KEGG PATHWAY	rno04630	12	142	0.310666	0.817055	64546;171081;25326;25647;289747;24500;25704;24498;652957;24649;292699;81680	Il12b;Csf2rb;Jak3;Il7;Osm;Il9r;Il2ra;Il6;Csf2ra;Pim1;Cblc;Lifr
Glycine, serine and threonine metabolism	KEGG PATHWAY	rno00260	4	39	0.310998	0.817055	366959;360816;58835;24962	Gcat;Sdsl;Phgdh;Cth
Biosynthesis of unsaturated fatty acids	KEGG PATHWAY	rno01040	3	27	0.314089	0.817055	50559;83792;246074	Acot1;Scd;Scd1
Starch and sucrose metabolism	KEGG PATHWAY	rno00500	5	52	0.31826	0.817055	25060;24434;83504;25059;54410	Hk3;Gusb;Kl;Hk2;Enpp3
Fanconi anemia pathway	KEGG PATHWAY	rno03460	5	52	0.31826	0.817055	360847;497672;360588;499870;497856	Ube2t;Brca1;Brip1;Rad51;Rmi2
Fc gamma R-mediated phagocytosis	KEGG PATHWAY	rno04666	8	91	0.323381	0.817055	114553;25156;170897;289211;296654;54227;295279;81511	Ncf1;Vav1;Sphk1;Fcgr2b;Gsn;Arpc1b;Fcgr1a;Lat
Nicotine addiction	KEGG PATHWAY	rno05033	4	40	0.32615	0.817055	191573;29695;81658;50592	Grin3a;Gabrr2;Gabrp;Gria1
Fructose and mannose metabolism	KEGG PATHWAY	rno00051	4	40	0.32615	0.817055	286921;24191;25060;25059	Akr1b8;Aldoc;Hk3;Hk2
Cysteine and methionine metabolism	KEGG PATHWAY	rno00270	4	40	0.32615	0.817055	24533;81718;360816;24962	Ldha;Cdo1;Sdsl;Cth
Viral myocarditis	KEGG PATHWAY	rno05416	8	93	0.343317	0.847095	25404;56822;294269;309621;24988;100363502;64625;688090	Cav1;Cd86;RT1-Da;RT1-Ba;RT1-M2;LOC100363502;Bid;RT1-Bb
Platelet activation	KEGG PATHWAY	rno04611	11	133	0.345113	0.847095	691992;24366;24367;84032;117558;60379;24886;25654;305509;25686;29393	Gp1ba;Fgb;Fgg;Col3a1;Mylk2;Col5a3;Tbxas1;Col11a1;Adcy1;Gnai1;Col1a1
Nitrogen metabolism	KEGG PATHWAY	rno00910	2	17	0.3569	0.859552	297814;29242	Car8;Car4
Allograft rejection	KEGG PATHWAY	rno05330	6	68	0.357262	0.859552	64546;56822;294269;309621;24988;688090	Il12b;Cd86;RT1-Da;RT1-Ba;RT1-M2;RT1-Bb
Selenocompound metabolism	KEGG PATHWAY	rno00450	2	18	0.381013	0.906977	368066;24962	Inmt;Cth
Cytosolic DNA-sensing pathway	KEGG PATHWAY	rno04623	5	57	0.384439	0.906977	24498;245920;116637;682147;498840	Il6;Cxcl10;Ccl4;Mb21d1;Tmem173
2-Oxocarboxylic acid metabolism	KEGG PATHWAY	rno01210	2	19	0.40473	0.929321	29592;24479	Bcat1;Idh1
One carbon pool by folate	KEGG PATHWAY	rno00670	2	19	0.40473	0.929321	299699;680308	Aldh1l2;Mthfd2
Galactose metabolism	KEGG PATHWAY	rno00052	3	32	0.405383	0.929321	286921;25060;25059	Akr1b8;Hk3;Hk2
@@Wnt signaling pathway	KEGG PATHWAY	rno04310	3	142	0.996708	0.999932	364754;289229;25335	Fzd8;Vangl2;Mmp7
cGMP-PKG signaling pathway	KEGG PATHWAY	rno04022	13	171	0.431921	0.972236	84396;50672;117558;25083;24212;24213;81743;83731;305509;29290;29639;29599;25686	Atp1b4;Ednrb;Mylk2;Adra2a;Atp1a2;Atp1a3;Pde2a;Kcnma1;Adcy1;Adora1;Fxyd2;Atp2b3;Gnai1
Fatty acid degradation	KEGG PATHWAY	rno00071	4	47	0.432105	0.972236	50549;308100;171142;113976	Cyp4a1;Acat2;Lbp;Acsl4
NF-kappa B signaling pathway	KEGG PATHWAY	rno04064	7	89	0.44274	0.987026	170929;78971;448830;116637;81511;60350;114105	Bcl2a1;Birc3;Ly96;Ccl4;Lat;Cd14;Cxcl2
Taurine and hypotaurine metabolism	KEGG PATHWAY	rno00430	1	8	0.45696	0.999932	81718	Cdo1
Primary immunodeficiency	KEGG PATHWAY	rno05340	3	35	0.458511	0.999932	64545;24931;25326	Icos;Cd8b;Jak3
Synaptic vesicle cycle	KEGG PATHWAY	rno04721	5	63	0.463253	0.999932	117596;685232;293650;297932;65046	Atp6v1b2;Atp6v1a;Tcirg1;Atp6v0d2;Ap2s1
Morphine addiction	KEGG PATHWAY	rno05032	7	92	0.475056	0.999932	29695;50599;81743;305509;29290;81658;25686	Gabrr2;Kcnj3;Pde2a;Adcy1;Adora1;Gabrp;Gnai1
Pentose and glucuronate interconversions	KEGG PATHWAY	rno00040	3	36	0.475774	0.999932	286921;83504;24434	Akr1b8;Kl;Gusb
African trypanosomiasis	KEGG PATHWAY	rno05143	3	36	0.475774	0.999932	64546;24498;25544	Il12b;Il6;Sele
Histidine metabolism	KEGG PATHWAY	rno00340	2	23	0.494736	0.999932	65029;25375	Aoc1;Aldh3a1
Protein export	KEGG PATHWAY	rno03060	2	24	0.515857	0.999932	266758;298068	Sec11c;Sec61b
PI3K-Akt signaling pathway	KEGG PATHWAY	rno04151	24	340	0.519597	0.999932	25729;25647;25704;24498;497672;78965;84032;292406;363265;29393;89804;362800;116640;25326;25654;289747;315981;304913;60379;24482;310553;311862;25661;25589	Ccne1;Il7;Il2ra;Il6;Brca1;Csf1;Col3a1;Thbs2;Col4a3;Col1a1;Tek;Itgb8;Tnc;Jak3;Col11a1;Osm;Col6a4;Tnn;Col5a3;Igf1;Tlr2;Lamc3;Fn1;Kdr
Vitamin B6 metabolism	KEGG PATHWAY	rno00750	1	10	0.525875	0.999932	54349	Aox1
Linoleic acid metabolism	KEGG PATHWAY	rno00591	3	40	0.542053	0.999932	81639;25086;29692	Alox15;Cyp2e1;Pla2g2a
Hypertrophic cardiomyopathy (HCM)	KEGG PATHWAY	rno05410	6	84	0.543756	0.999932	362800;301518;24498;24482;498012;24310	Itgb8;Prkag3;Il6;Igf1;Ace3;Ace
Proteoglycans in cancer	KEGG PATHWAY	rno05205	14	202	0.557641	0.999932	64546;310553;25404;292699;50692;364754;304109;25661;29186;25589;81682;24890;24482;81687	Il12b;Tlr2;Cav1;Cblc;Plaur;Fzd8;Tiam1;Fn1;Cd63;Kdr;Lum;Esr1;Igf1;Mmp9
Pyruvate metabolism	KEGG PATHWAY	rno00620	3	41	0.557851	0.999932	24533;311569;308100	Ldha;Acss2;Acat2
Glutathione metabolism	KEGG PATHWAY	rno00480	4	56	0.560219	0.999932	81869;362720;100359539;24479	Gstm7;Rrm2;LOC100359539;Idh1
Ovarian steroidogenesis	KEGG PATHWAY	rno04913	4	56	0.560219	0.999932	305509;25557;24482;59302	Adcy1;Star;Igf1;Bmp15
AMPK signaling pathway	KEGG PATHWAY	rno04152	9	130	0.56482	0.999932	25330;83516;50671;24255;301518;114494;83792;246074;24482	Lipe;Ppargc1a;Fasn;Cftr;Prkag3;Ccna2;Scd;Scd1;Igf1
Influenza A	KEGG PATHWAY	rno05164	12	176	0.581043	0.999932	64546;245920;688090;287562;294269;83791;24498;309621;367074;24770;24493;100363502	Il12b;Cxcl10;RT1-Bb;Ccl12;RT1-Da;Fdps;Il6;RT1-Ba;Tmprss4;Ccl2;Il1a;LOC100363502
Mucin type O-Glycan biosynthesis	KEGG PATHWAY	rno00512	2	28	0.594282	0.999932	83627;100360475	Galnt5;Galnt15
Measles	KEGG PATHWAY	rno05162	9	135	0.607812	0.999932	64546;310553;25729;289211;25326;24807;25704;24498;24493	Il12b;Tlr2;Ccne1;Fcgr2b;Jak3;Tacr1;Il2ra;Il6;Il1a
Arginine and proline metabolism	KEGG PATHWAY	rno00330	4	60	0.611886	0.999932	29221;65029;24599;287877	Arg1;Aoc1;Nos2;Pycr1
Pathways in cancer	KEGG PATHWAY	rno05200	22	329	0.618649	0.999932	78971;25729;29591;29452;24498;364754;652957;81819;81687;24778;292699;363265;24599;100363502;498709;24482;366126;311862;64041;25661;64625;499870	Birc3;Ccne1;Tgfbr1;Epas1;Il6;Fzd8;Csf2ra;Pax8;Mmp9;Slc2a1;Cblc;Col4a3;Nos2;LOC100363502;Cks2;Igf1;Spi1;Lamc3;Birc5;Fn1;Bid;Rad51
@@TGF-beta signaling pathway	KEGG PATHWAY	rno04350	5	82	0.682524	0.999932	367100;25495;29591;29200;680111	Smad6;Nog;Tgfbr1;Inhba;Rbl1
T cell receptor signaling pathway	KEGG PATHWAY	rno04660	7	107	0.625933	0.999932	64545;25156;63835;81511;292699;84492;24931	Icos;Vav1;Ctla4;Lat;Cblc;Tec;Cd8b
Hepatitis B	KEGG PATHWAY	rno05161	9	141	0.656428	0.999932	310553;25729;29591;114494;24498;64041;100363502;114090;81687	Tlr2;Ccne1;Tgfbr1;Ccna2;Il6;Birc5;LOC100363502;Egr2;Mmp9
beta-Alanine metabolism	KEGG PATHWAY	rno00410	2	32	0.662795	0.999932	25375;171142	Aldh3a1;Lbp
MicroRNAs in cancer	KEGG PATHWAY	rno05206	9	144	0.679386	0.999932	684771;116640;24649;304913;497672;170913;25729;81687;24646	Cdca5;Tnc;Pim1;Tnn;Brca1;Abcb1a;Ccne1;Mmp9;Abcb1b
Sulfur metabolism	KEGG PATHWAY	rno00920	1	16	0.684464	0.999932	100363502	LOC100363502
Metabolism of xenobiotics by cytochrome P450	KEGG PATHWAY	rno00980	4	67	0.692713	0.999932	81869;25086;25375;54246	Gstm7;Cyp2e1;Aldh3a1;Cyp2f4
Type II diabetes mellitus	KEGG PATHWAY	rno04930	3	51	0.696507	0.999932	25060;366949;25059	Hk3;Mafa;Hk2
Adrenergic signaling in cardiomyocytes	KEGG PATHWAY	rno04261	9	148	0.708507	0.999932	315611;29599;24212;24213;84396;305509;29639;252857;25686	Scn4b;Atp2b3;Atp1a2;Atp1a3;Atp1b4;Adcy1;Fxyd2;Rapgef4;Gnai1
Apoptosis	KEGG PATHWAY	rno04210	5	85	0.711017	0.999932	171081;64625;24493;78971;100363502	Csf2rb;Bid;Il1a;Birc3;LOC100363502
Other glycan degradation	KEGG PATHWAY	rno00511	1	18	0.724519	0.999932	24375	Fuca1
Retrograde endocannabinoid signaling	KEGG PATHWAY	rno04723	6	103	0.727283	0.999932	50592;29695;50599;305509;81658;25686	Gria1;Gabrr2;Kcnj3;Adcy1;Gabrp;Gnai1
FoxO signaling pathway	KEGG PATHWAY	rno04068	8	135	0.727819	0.999932	29591;310344;301518;24498;24787;25203;24482;25515	Tgfbr1;Plk4;Prkag3;Il6;Sod2;Ccnb1;Igf1;Plk1
Tyrosine metabolism	KEGG PATHWAY	rno00350	2	37	0.734967	0.999932	54349;25375	Aox1;Aldh3a1
HTLV-I infection	KEGG PATHWAY	rno05166	18	292	0.736997	0.999932	171576;296344;117022;366126;25326;294269;24778;29591;64515;309621;25704;24498;364754;24988;83791;114090;305509;688090	Bub1b;Mybl2;Il1r2;Spi1;Jak3;RT1-Da;Slc2a1;Tgfbr1;Cdc20;RT1-Ba;Il2ra;Il6;Fzd8;RT1-M2;Fdps;Egr2;Adcy1;RT1-Bb
Drug metabolism - other enzymes	KEGG PATHWAY	rno00983	3	55	0.741841	0.999932	24834;690050;24434	Tk1;Tpmt;Gusb
Glycerolipid metabolism	KEGG PATHWAY	rno00561	3	56	0.752293	0.999932	291437;286921;79223	Lipg;Akr1b8;Gk
Herpes simplex infection	KEGG PATHWAY	rno05168	13	218	0.754265	0.999932	64546;116544;287562;294269;54237;24498;309621;24988;310553;100363502;24770;24232;688090	Il12b;Pou2f3;Ccl12;RT1-Da;Cdk1;Il6;RT1-Ba;RT1-M2;Tlr2;LOC100363502;Ccl2;C3;RT1-Bb
Phenylalanine metabolism	KEGG PATHWAY	rno00360	1	20	0.759491	0.999932	25375	Aldh3a1
Adipocytokine signaling pathway	KEGG PATHWAY	rno04920	4	74	0.760777	0.999932	24778;83516;301518;113976	Slc2a1;Ppargc1a;Prkag3;Acsl4
Porphyrin and chlorophyll metabolism	KEGG PATHWAY	rno00860	2	40	0.771629	0.999932	24451;24434	Hmox1;Gusb
Fat digestion and absorption	KEGG PATHWAY	rno04975	2	40	0.771629	0.999932	308100;29692	Acat2;Pla2g2a
Amyotrophic lateral sclerosis (ALS)	KEGG PATHWAY	rno05014	3	59	0.781614	0.999932	64625;50592;100363502	Bid;Gria1;LOC100363502
Insulin signaling pathway	KEGG PATHWAY	rno04910	8	144	0.786807	0.999932	114203;25060;83516;25059;50671;25330;301518;292699	Sh2b2;Hk3;Ppargc1a;Hk2;Fasn;Lipe;Prkag3;Cblc
Ether lipid metabolism	KEGG PATHWAY	rno00565	2	42	0.793541	0.999932	361527;29692	Pld3;Pla2g2a
Bacterial invasion of epithelial cells	KEGG PATHWAY	rno05100	4	78	0.794072	0.999932	54227;25404;25661;292699	Arpc1b;Cav1;Fn1;Cblc
Inflammatory mediator regulation of TRP channels	KEGG PATHWAY	rno04750	6	113	0.800082	0.999932	29597;29465;50549;305509;25364;24482	P2ry2;Trpv2;Cyp4a1;Adcy1;Asic2;Igf1
Mismatch repair	KEGG PATHWAY	rno03430	1	23	0.803808	0.999932	305000	Exo1
Estrogen signaling pathway	KEGG PATHWAY	rno04915	5	97	0.806663	0.999932	305509;25686;50599;24890;81687	Adcy1;Gnai1;Kcnj3;Esr1;Mmp9
RIG-I-like receptor signaling pathway	KEGG PATHWAY	rno04622	3	62	0.808007	0.999932	64546;245920;498840	Il12b;Cxcl10;Tmem173
Long-term depression	KEGG PATHWAY	rno04730	3	62	0.808007	0.999932	25686;50592;24482	Gnai1;Gria1;Igf1
Retinol metabolism	KEGG PATHWAY	rno00830	4	80	0.809267	0.999932	50549;54349;24299;170635	Cyp4a1;Aox1;Cyp2a3;Dhrs9
Glutamatergic synapse	KEGG PATHWAY	rno04724	6	115	0.812667	0.999932	84012;50592;191573;50599;305509;25686	Slc1a6;Gria1;Grin3a;Kcnj3;Adcy1;Gnai1
Glycosaminoglycan biosynthesis - heparan sulfate / heparin	KEGG PATHWAY	rno00534	1	24	0.816686	0.999932	302489	Hs6st2
alpha-Linolenic acid metabolism	KEGG PATHWAY	rno00592	1	25	0.82872	0.999932	29692	Pla2g2a
Glyoxylate and dicarboxylate metabolism	KEGG PATHWAY	rno00630	1	25	0.82872	0.999932	308100	Acat2
@@VEGF signaling pathway	KEGG PATHWAY	rno04370	2	60	0.92043	0.999932	25589;170897	Kdr;Sphk1
Cardiac muscle contraction	KEGG PATHWAY	rno04260	4	84	0.836906	0.999932	24212;24213;29639;84396	Atp1a2;Atp1a3;Fxyd2;Atp1b4
Regulation of actin cytoskeleton	KEGG PATHWAY	rno04810	12	220	0.839092	0.999932	499271;117558;25156;304109;362800;25021;290396;296654;54227;25661;60350;310621	Itgax;Mylk2;Vav1;Tiam1;Itgb8;Itgam;Diaph3;Gsn;Arpc1b;Fn1;Cd14;Iqgap3
Cocaine addiction	KEGG PATHWAY	rno05030	2	47	0.840366	0.999932	191573;25686	Grin3a;Gnai1
Thyroid hormone signaling pathway	KEGG PATHWAY	rno04919	6	120	0.841405	0.999932	24778;24212;24213;84396;29639;24890	Slc2a1;Atp1a2;Atp1a3;Atp1b4;Fxyd2;Esr1
Fatty acid elongation	KEGG PATHWAY	rno00062	1	27	0.850469	0.999932	50559	Acot1
Phototransduction	KEGG PATHWAY	rno04744	1	27	0.850469	0.999932	365901	Gnat2
Homologous recombination	KEGG PATHWAY	rno03440	1	27	0.850469	0.999932	499870	Rad51
Colorectal cancer	KEGG PATHWAY	rno05210	3	68	0.852755	0.999932	64041;100363502;29591	Birc5;LOC100363502;Tgfbr1
Chemical carcinogenesis	KEGG PATHWAY	rno05204	4	87	0.855364	0.999932	83783;81869;25086;25375	Sult1a1;Gstm7;Cyp2e1;Aldh3a1
Vascular smooth muscle contraction	KEGG PATHWAY	rno04270	6	123	0.856863	0.999932	58966;50549;117558;29692;83731;305509	Ramp2;Cyp4a1;Mylk2;Pla2g2a;Kcnma1;Adcy1
Glycosphingolipid biosynthesis - lacto and neolacto series	KEGG PATHWAY	rno00601	1	28	0.860286	0.999932	290638	B3gnt3
Pentose phosphate pathway	KEGG PATHWAY	rno00030	1	28	0.860286	0.999932	24191	Aldoc
Serotonergic synapse	KEGG PATHWAY	rno04726	6	124	0.861732	0.999932	50599;81639;25553;24848;25686;266684	Kcnj3;Alox15;Slc6a4;Tph1;Gnai1;Cyp2d1
Fc epsilon RI signaling pathway	KEGG PATHWAY	rno04664	3	70	0.865505	0.999932	25156;81511;25316	Vav1;Lat;Ms4a2
Thyroid cancer	KEGG PATHWAY	rno05216	1	29	0.869459	0.999932	81819	Pax8
Pyrimidine metabolism	KEGG PATHWAY	rno00240	5	108	0.870488	0.999932	316077;24834;100359539;362720;191575	Entpd3;Tk1;LOC100359539;Rrm2;Nme1
Endocytosis	KEGG PATHWAY	rno04144	13	245	0.870604	0.999932	25404;29591;65046;293154;25704;367100;24988;117029;292699;25589;171049;192249;500906	Cav1;Tgfbr1;Ap2s1;Folr2;Il2ra;Smad6;RT1-M2;Ccr5;Cblc;Kdr;Folr1;Ehd3;Cyth4
GABAergic synapse	KEGG PATHWAY	rno04727	4	90	0.872013	0.999932	29695;305509;81658;25686	Gabrr2;Adcy1;Gabrp;Gnai1
Rap1 signaling pathway	KEGG PATHWAY	rno04015	11	214	0.878587	0.999932	89804;78965;361442;25589;304109;81511;305509;252857;25686;24482;25021	Tek;Csf1;Sipa1l2;Kdr;Tiam1;Lat;Adcy1;Rapgef4;Gnai1;Igf1;Itgam
Calcium signaling pathway	KEGG PATHWAY	rno04020	9	182	0.885623	0.999932	89788;50672;170897;58949;117558;24807;29599;305509;24599	Gna15;Ednrb;Sphk1;Ptafr;Mylk2;Tacr1;Atp2b3;Adcy1;Nos2
Citrate cycle (TCA cycle)	KEGG PATHWAY	rno00020	1	32	0.89352	0.999932	24479	Idh1
Circadian entrainment	KEGG PATHWAY	rno04713	4	96	0.900399	0.999932	305509;25686;50592;50599	Adcy1;Gnai1;Gria1;Kcnj3
Natural killer cell mediated cytotoxicity	KEGG PATHWAY	rno04650	4	97	0.904548	0.999932	361537;64625;25156;81511	Tyrobp;Bid;Vav1;Lat
Melanogenesis	KEGG PATHWAY	rno04916	4	97	0.904548	0.999932	305509;364754;25686;50672	Adcy1;Fzd8;Gnai1;Ednrb
Metabolic pathways	KEGG PATHWAY	rno01100	79	1295	0.904849	0.999932	367166;85497;300691;29592;293650;25059;58962;286921;24834;58835;50671;24333;25427;83791;100359539;29692;59103;29230;81726;361527;25375;100360475;170897;286896;24533;293504;50559;81718;117099;313339;117596;24299;29637;24962;24848;24450;24434;24479;24191;64468;25060;116720;298298;687266;54349;311569;170635;191575;140910;64191;24886;297932;114097;29221;685232;113976;24383;360816;683570;171142;83627;…	Hyal1;Klf15;Nnmt;Bcat1;Tcirg1;Hk2;Hpgds;Akr1b8;Tk1;Phgdh;Fasn;Eno1;Cyp51;Fdps;LOC100359539;Pla2g2a;Ptges;Sqle;Mvd;Pld3;Aldh3a1;Galnt15;Sphk1;Sgpl1;Ldha;Qprt;Acot1;Cdo1;Bdh1;Acer2;Atp6v1b2;Cyp2a3;Hmgcs1;Cth;Tph1;Hmgcs2;Gusb;Idh1;Aldoc;Hyal2;Hk3;Pik3c2g;Dhcr24;Fpgs;Aox1;Acss2;Dhrs9;Nme1;Msmo1;Dhcr7;Tbxas1;Atp6v0d2;Ltc4s;Arg1;Atp6v1a;Acsl4;Gapdh;Sdsl;Gnpda1;Lbp;Galnt5;Cyp4a1;Nos2;Cyp2e1;Idi1;B3gnt3;…
Lysine degradation	KEGG PATHWAY	rno00310	2	57	0.906277	0.999932	308100;171142	Acat2;Lbp
Acute myeloid leukemia	KEGG PATHWAY	rno05221	2	57	0.906277	0.999932	24649;366126	Pim1;Spi1
Steroid hormone biosynthesis	KEGG PATHWAY	rno00140	3	80	0.915677	0.999932	25086;24950;266684	Cyp2e1;Srd5a1;Cyp2d1
Bladder cancer	KEGG PATHWAY	rno05219	1	37	0.924181	0.999932	81687	Mmp9
Taste transduction	KEGG PATHWAY	rno04742	2	62	0.92872	0.999932	25364;365391	Asic2;Trpm5
Signaling pathways regulating pluripotency of stem cells	KEGG PATHWAY	rno04550	6	143	0.930973	0.999932	299210;25326;364754;29200;81680;24482	Esrrb;Jak3;Fzd8;Inhba;Lifr;Igf1
Amphetamine addiction	KEGG PATHWAY	rno05031	2	65	0.939638	0.999932	191573;50592	Grin3a;Gria1
Long-term potentiation	KEGG PATHWAY	rno04720	2	65	0.939638	0.999932	305509;50592	Adcy1;Gria1
Pancreatic cancer	KEGG PATHWAY	rno05212	2	65	0.939638	0.999932	499870;29591	Rad51;Tgfbr1
Dilated cardiomyopathy	KEGG PATHWAY	rno05414	3	88	0.94281	0.999932	305509;362800;24482	Adcy1;Itgb8;Igf1
Cholinergic synapse	KEGG PATHWAY	rno04725	4	111	0.948456	0.999932	305509;25686;116649;50599	Adcy1;Gnai1;Kcnj4;Kcnj3
Renal cell carcinoma	KEGG PATHWAY	rno05211	2	68	0.948955	0.999932	24778;29452	Slc2a1;Epas1
Ubiquitin mediated proteolysis	KEGG PATHWAY	rno04120	5	135	0.956403	0.999932	497672;78971;64515;296368;292699	Brca1;Birc3;Cdc20;Ube2c;Cblc
B cell receptor signaling pathway	KEGG PATHWAY	rno04662	2	72	0.959261	0.999932	25156;289211	Vav1;Fcgr2b
Oxytocin signaling pathway	KEGG PATHWAY	rno04921	6	158	0.961835	0.999932	117558;116649;301518;50599;305509;25686	Mylk2;Kcnj4;Prkag3;Kcnj3;Adcy1;Gnai1
Adherens junction	KEGG PATHWAY	rno04520	2	74	0.963635	0.999932	314843;29591	Ptprb;Tgfbr1
Arrhythmogenic right ventricular cardiomyopathy (ARVC)	KEGG PATHWAY	rno05412	2	74	0.963635	0.999932	362800;24392	Itgb8;Gja1
Chronic myeloid leukemia	KEGG PATHWAY	rno05220	2	76	0.967555	0.999932	292699;29591	Cblc;Tgfbr1
Purine metabolism	KEGG PATHWAY	rno00230	7	182	0.968065	0.999932	191575;362720;81743;305509;316077;100359539;54410	Nme1;Rrm2;Pde2a;Adcy1;Entpd3;LOC100359539;Enpp3
Basal cell carcinoma	KEGG PATHWAY	rno05217	1	55	0.977686	0.999932	364754	Fzd8
Ras signaling pathway	KEGG PATHWAY	rno04014	9	230	0.977693	0.999932	89804;78965;192213;288589;29692;304109;81511;25589;24482	Tek;Csf1;Rasgrf1;Rasa4;Pla2g2a;Tiam1;Lat;Kdr;Igf1
Non-alcoholic fatty liver disease (NAFLD)	KEGG PATHWAY	rno04932	6	175	0.98126	0.999932	25086;301518;24498;100363502;64625;24493	Cyp2e1;Prkag3;Il6;LOC100363502;Bid;Il1a
Prostate cancer	KEGG PATHWAY	rno05215	2	89	0.984709	0.999932	25729;24482	Ccne1;Igf1
GnRH signaling pathway	KEGG PATHWAY	rno04912	2	90	0.985579	0.999932	305509;81707	Adcy1;Mmp14
Tight junction	KEGG PATHWAY	rno04530	4	139	0.986323	0.999932	691644;290485;25686;84588	Myh1;Cldn10;Gnai1;Cldn11
Glycerophospholipid metabolism	KEGG PATHWAY	rno00564	2	92	0.987177	0.999932	361527;29692	Pld3;Pla2g2a
Glioma	KEGG PATHWAY	rno05214	1	64	0.987899	0.999932	24482	Igf1
mTOR signaling pathway	KEGG PATHWAY	rno04150	1	64	0.987899	0.999932	24482	Igf1
Inositol phosphate metabolism	KEGG PATHWAY	rno00562	1	66	0.989437	0.999932	116720	Pik3c2g
Neurotrophin signaling pathway	KEGG PATHWAY	rno04722	3	124	0.991161	0.999932	114203;25054;60450	Sh2b2;Ntrk2;Matk
Melanoma	KEGG PATHWAY	rno05218	1	71	0.992482	0.999932	24482	Igf1
MAPK signaling pathway	KEGG PATHWAY	rno04010	9	260	0.993041	0.999932	24493;117022;29477;311406;25054;192213;246781;29591;60350	Il1a;Il1r2;Mapt;Dusp2;Ntrk2;Rasgrf1;Ptpn7;Tgfbr1;Cd14
Axon guidance	KEGG PATHWAY	rno04360	3	130	0.993619	0.999932	306636;25686;290562	Efnb2;Gnai1;Sema3g
Dopaminergic synapse	KEGG PATHWAY	rno04728	3	131	0.993959	0.999932	25686;50592;50599	Gnai1;Gria1;Kcnj3
Prolactin signaling pathway	KEGG PATHWAY	rno04917	1	75	0.994273	0.999932	24890	Esr1
Oxidative phosphorylation	KEGG PATHWAY	rno00190	4	157	0.994464	0.999932	117596;685232;293650;297932	Atp6v1b2;Atp6v1a;Tcirg1;Atp6v0d2
Hippo signaling pathway	KEGG PATHWAY	rno04390	4	157	0.994464	0.999932	364754;64041;689709;29591	Fzd8;Birc5;Frmd1;Tgfbr1
RNA degradation	KEGG PATHWAY	rno03018	1	81	0.996193	0.999932	24333	Eno1
Phosphatidylinositol signaling system	KEGG PATHWAY	rno04070	1	81	0.996193	0.999932	116720	Pik3c2g
Alzheimer's disease	KEGG PATHWAY	rno05010	5	200	0.997919	0.999932	64625;24383;100363502;29477;25728	Bid;Gapdh;LOC100363502;Mapt;Apoe
ErbB signaling pathway	KEGG PATHWAY	rno04012	1	90	0.997936	0.999932	292699	Cblc
Epstein-Barr virus infection	KEGG PATHWAY	rno05169	6	229	0.998425	0.999932	366126;25326;54237;114494;24988;316077	Spi1;Jak3;Cdk1;Ccna2;RT1-M2;Entpd3
Hepatitis C	KEGG PATHWAY	rno05160	2	128	0.998527	0.999932	290485;84588	Cldn10;Cldn11
Ribosome	KEGG PATHWAY	rno03010	3	178	0.999575	0.999932	100360781;361923;81772	LOC100360781;Rpl22l1;Rps9
Huntington's disease	KEGG PATHWAY	rno05016	4	213	0.999722	0.999932	65046;24787;83516;100363502	Ap2s1;Sod2;Ppargc1a;LOC100363502
Parkinson's disease	KEGG PATHWAY	rno05012	2	169	0.999884	0.999932	25686;100363502	Gnai1;LOC100363502
Protein processing in endoplasmic reticulum	KEGG PATHWAY	rno04141	2	169	0.999884	0.999932	100362805;298068	Txndc5;Sec61b
Spliceosome	KEGG PATHWAY	rno03040	1	140	0.999932	0.999932	309651	Ppil1
